# Supplementary material for: Physics-based forecast modelling of rip-current and shore-break wave hazards
Source: Copernicus journal article supplement (doi:10.5194/nhess-2024-168), 2024-12-03
Supplement: Supplementary file [file nhess-2024-168-AC2-supplement.pdf]

## Overview:

\* This is a well-written paper that is a significant contribution to forecasting rip-current and shore-break hazards using simple models informed by physics and calibrated with lifeguard observations of hazard levels. The introduction is thorough and logically organized and helpful physical parameter schematics are provided. Visualizations throughout are high quality. Time series of physics-informed parameterizations show remarkable agreement with lifeguard assessments of hazard. I found the idealized analysis showing how the models can be applied to hypothetical conditions to be interesting and informative.

*Reply : We thank Reviewer #2 for their support for publication, constructive criticism, and insightful comments on the model. In the detailed response below, you will see that all the comments have been carefully considered and the necessary changes have been made. We are grateful to the reviewer for having helped us to strengthen our paper.*

\* Prior to publication, I think the paper needs to provide more clear derivations and justification of assumptions leading to the new physics-based models; these could appear concisely in the main text or in a more detailed form in supplementary materials. There may be some errors in the rip-current speed and shore-break energy formulas, but it is difficult to assess without seeing more detail in how the authors reached those results. The rip-current hazard formulations based on rip-current speed have previously been derived and compared with lifeguard observations, and the authors derive their result from momentum balances (though more justification is needed). In contrast, the authors note that no theoretical estimate for shore-break hazard yet exists. The proposed shore-break formulation – the product of the Irribarren number and the wave energy – seems highly valuable, but given that it is somewhat ad hoc, maybe it would be more accurately described as semi-empirical or physics-informed rather than physics-based.

*Reply : We warmly thank Reviewer #2 once again for their insightful comments on the two models. In the detailed replies to the comments below, you will see that the models have been modified in line with the reviewer's suggestions. While these changes did not alter the overall results and outcomes, except for adjustments to the threshold values and slight modifications to the correlation and confusion matrices (by less than 5%), the construction is now more robust. Additionally, we now systematically refer to the two models as 'semi-empirical' instead of 'physics-based.' The modifications are outlined in our replies below.*

\* The second broader comment I have is that some additional discussion of the limitations of this approach and its applicability to other sites would be helpful. Specifically, this approach seems to apply to sites where channel rips dominate, and the importance of other rip current types should be discussed. In addition, for applicability to other sites, it would be good to discuss how a minimal set of sandbar and beach profile shape parameters could be observed directly or estimated through tuning/calibration with lifeguard data, so that readers can assess feasibility. Line-by-line comments below indicate specific places where I suggest clarification on the physics-based parameterization and limitations/applicability.

*Reply : Thank you for emphasizing this limitation. This is now addressed in the Discussion sections such as “his study focused on channel rip currents, the most common rip type on intermediate beaches, although other types of rip currents exist (see Dalrymple et al., 2011; Castelle et al., 2016b; Houser et al., 2020). With the notable exception of Casper et al. (2024), who explored the potential for forecasting flash rip hazards at a Californian beach, hazard forecasting for other rip current types has never been tested. Our model is therefore mostly adapted for intermediate, high-energy, sandy beaches” Or, when dealing with the replicability of the approach and calibration : “However, while parameters such as bar crest*

depth and channel depth are relatively simple, obtaining them remains challenging due to the difficulty of surveying the surf zone, which is not routinely monitored at most locations. This raises important considerations for the large-scale transferability of the models. Future applications will need to determine how these parameters can be feasibly obtained, whether through direct surveying, remote sensing, or empirical estimations based on regional morphology. Additionally, while the calibrated values used in this study may serve as a reference, their applicability to other sites remains uncertain, and further research is needed to assess whether re-calibration against lifeguard observations or other validation datasets is necessary at each new location.” See also some specific replies to the comments below.

### **Line-by-line comments:**

- L36-38: “The most common rip type” - Clarify, this may be true on some beaches but not others

*Reply : We agree, we now specify that it is true on intermediate beaches “The most common rip type on intermediate beaches (Wright and Short, 1984; Castelle and Masselink, 2023) flows through channels carved into nearshore sandbars (e.g. Houser et al., 2013).”*

- L73: “The proposed framework offers new opportunities for forecasting rip-current and shore-break wave hazards at surf beaches with available wave predictions” - Morphology information also is needed, and ideally lifeguard observations for calibration. Consider adding these factors to the sentence.

*Reply : We agree, based on your comment and that of Reviewer #1 this now reads “These simple semi-empirical models providing quantitative estimates of rip-flow speed and shore-break wave energy, and an associated 5-level scale hazard rating, only require a limited number of time-invariant free parameters related to beach morphology and wave breaking onset. These parameters can either be given based to some knowledge of the beach morphology, or through calibration using lifeguard-perceived hazard data. The proposed framework, here applied to a single beach in southwest France, offers new opportunities for forecasting rip-current and shore-break wave hazards at surf beaches with available wave and tide predictions.”*

- L131: “Rip current hazard can be estimated through the rip flow speed.” Discussion section should cover how flow patterns and other factors may also affect hazard.

*Reply: Thank you for raising this important point. This is now addressed in the Discussion section “It must also be acknowledged that the rip current hazard in this study was estimated based solely on rip-flow speed. However, other flow characteristics can also influence the physical hazard, such as the rip current circulation regime, which plays an important role in determining the optimal rip-current escape strategy (McCarroll et al., 2014a). Surf-zone rip currents have long been perceived as narrow flows extending well beyond the breakers, rapidly flushing water out of the surf zone in what is known as the ‘exit flow’ circulation regime. However, studies using Lagrangian drifter measurements to compute surf-zone exit rates (e.g. MacMahan et al., 2010; McCarroll et al., 2014b) have shown that rip-flow patterns can also form quasi-steady, semi-enclosed vortices that retain most floating material within the surf zone, referred to as the ‘circulatory flow’ circulation regime. Unlike the exit-flow regime, the circulatory regime increases the likelihood that a swimmer caught in a rip current will be carried back to shallower, safer waters within a few minutes (McCarroll et al., 2015; Castelle et al., 2016a). Although observed and modelled exit rates in channel rips show*

*considerable natural variability, the highest exit rates are generally associated with the lowest incident wave energy, and consequently, the lowest rip-flow speeds (see review in Castelle et al., 2016b). ”*

• L141, L146: “ $S=0.16*H_s$ ”, “ $S_b=0.16*\Delta H_{sb}$ ”, “ $S_c=0.16*\Delta H_{sc}$ ” Please clarify under what assumptions these approximations are reasonable to use, and what assumptions are involved to modify the approximation for shoreline setup (as a function of wave height) to estimate setup immediately onshore of the bar and channel (cross-shore change in waveheight)? Does this assume breaking in the channel as well as on the bar? My intuition would say that  $S_b$ - $S_c$  would then be independent of the offshore wave height, but the squared wave height decay equation suggests otherwise (see next comment). How does this more simplified approximation compare with other formulations that include more parameters, e.g., Moulton et al. 2017 / Casper et al. 2024? A simpler formulation with fewer parameters is ideal for hazard prediction if it is clarified under what conditions it is a reasonable approximation. It seems like this formulation could be roughly a factor of 4 larger than Moulton/Casper, but I’m not completely sure, especially given the complexity of the quadratic delta-H formula.

*Reply : Thank you for pointing this. The assumption for obtaining  $S_b$  and  $S_c$  (note that variable names were changed according to a later comment) are now clarified : “Considering Equation (1), but looking immediately onshore of the bar/rip system instead of the waterline, where the entire incident wave energy has been dissipated, and by further ignoring set-down, wave refraction, wave-current interaction, we can make the first-pass assumption that wave-set up immediately onshore of the bar/rip system is controlled by the change in wave height due to depth-induced breaking across the bar and/or the channel. We can therefore assume  $\eta_b = 0.16\Delta H_{sb}$  and  $\eta_c = 0.16\Delta H_{sc}$ , where  $\Delta H_{sb}$  and  $\Delta H_{sc}$  are the decrease in wave height due to depth-induced breaking across the bar and the channel, respectively (Figure 3b)”.  $S_b$ - $S_c$  would be independent on wave height if (1) breaking occurs in across both the channel and the bar and (2) if only regular waves are considered (see response to next comment), which is a major difference with Moulton/Casper approach. The advantage here is, as Reviewer #2 indicates, that our formulation is simpler, but the drawback is that physical foundations of the approach is less robust because we do not consider regular waves (see also next comment). We think that the two approaches are complementary, and in the end provide similar results. Future work could involve comparing the two approaches.*

• L148-151: “Here we consider simple first-pass estimation of the significant wave height decay for irregular waves.” – Is there a reference for this? Or provide a derivation or more explanation. Assuming a wave breaking gamma and single wave height, I would expect  $\Delta H_s$  to be simply  $H_s - H$ , where  $H = \gamma * h$  for broken waves. Does Equation (2) differ from this due to considering an irregular wavefield, e.g., Rayleigh distributed wave heights? & L150: It could be worth spelling out the two equations for  $H_{sb}$  and  $H_{sc}$ , so that the dependence of the speed on the bar-channel geometry is clearer

*Reply : Thank you again for pointing this out, and we apologize for not providing enough information about the underlying assumptions. Equation (2) indeed differs from the simple formulation  $H_s = \gamma h$  because we are considering random waves. Unfortunately, unlike regular waves, there is no straightforward solution for estimating irregular wave heights in the surf zone, even for planar beaches. Therefore, this simplified approach (Equation (2) and Fig. 3d) was inspired by the typical cross-shore distribution of  $H_s$  or  $H_{rms}$  observed in the surf zone for irregular waves and planar beaches. In reality, this distribution depends on many other factors, but it serves as a first-order, simplified approximation to the known curves (see Dally, 1990, Coastal Engineering). This distribution also explains why  $S_b$ - $S_c$  depends on offshore wave height. We have now clarified this in the model description section, explicitly stating the*

two equations for  $H_{sb}$  and  $H_{sc}$ . “Critical to both  $\Delta H_{sb}$  and  $\Delta H_{sc}$  is the depth-induced breaking wave height decay law. Unlike regular waves, there is no simple method to estimate irregular wave heights in the surf zone, even on planar beaches. Previous studies (Dally, 1990) have shown that the root mean square wave height distribution in the surf zone on planar beaches depends on various factors, including beach slope and wave steepness. However, by neglecting wave shoaling effects and for the sake of simplicity, a physics-informed (Dally, 1990) estimation of the depth-induced breaking significant wave height decay,  $\Delta H_s$ , for irregular waves (Figure 3d), can be expressed as:

Eq(2)

for  $h_i > 0$  and  $H_s > \gamma h_i$  (broken waves), where  $h_i$  is the local water depth with subscript  $i$  referring to the bar ( $i = b$ ) or the channel ( $i = c$ ),  $\gamma$  is the breaker parameter for random waves, and  $H_s$  is the significant wave height at breaking (after transformation through Larson et al., 2010). The depth-induced breaking significant wave height decay over the sandbar  $\Delta H_{sb}$  (the channel  $\Delta H_{sc}$ ) are given by:

Eq (3)

Eq (4)

with  $\zeta$  the tide elevation,  $\bar{z}$  the elevation of the sandbar and  $d$  the channel depth (Figure 3b).”

- L152: Please provide references and/or justification for the simplified momentum balance & L155: I think more justification is needed for these approximations. Is it known that the setup varies over a lengthscale of the width of the channel? Why not a half-width, or a multiple of the width, or something else like the spacing between channels, or a frictional lengthscale? I don’t think this is actually known. Similarly, for the advective term, given the argument is that this is a physics-based parameterization, a derivation should be provided. Using the continuity equation with the left-hand side of Equation 3, it is not clear how the  $2*V^2*h/w$  approximation is reached. Are assumptions made about  $U=V$  or  $U=1/2*V$  or  $U=2*V$ ? Is the alongshore lengthscale  $w$  or  $1/2*w$  or  $2*w$ ? Is it assumed that alongshore depth variations are small ( $dh/dx * 1/h$  is small)?

*Reply : We thank Reviewer #2 for raising this point. For consistency we now use the same approach to link rip flow velocity and gradients in wave set-up. This reads “Following Moulton et al. (2017b), we assume that the ratio of bottom stress to the advection term is small, and that the balance of pressure gradients and advection along a streamline can be approximated using the Bernoulli equation. By further neglecting the effects of inertia in a longshore current driven by obliquely incident breaking waves, the rip flow velocity  $V$  can be approximated as:*

Eq (5)

*where  $\eta_b = 0.16\Delta H_{sb}$  and  $\eta_c = 0.16\Delta H_{sc}$  the wave set-up onshore of the bar and of the channel, respectively. Note that, because of the irregular wave height decay law (Equation (2)), the alongshore gradient in wave set-up, and thus rip-flow speed  $V$ , depend on  $d$ ,  $\bar{z}$  and  $H_s$ , whereas assuming regular waves, it would be independent of  $H_s$  when depth-induced breaking occurs both over the channel and the sandbar.”*

- L157: (Equation 4) I’m not convinced this formula is correct. The Moulton 2017 / Casper 2024 formula would be  $\sqrt{2*g*(S_b-S_c)}$ , which is different from this by a factor of 2. The  $S_b-S_c$  formula may have an extra factor of 4 relative to the Moulton 2017 setup difference estimate. Interestingly, these differences would compensate each other. I would have most confidence in a formulation that is consistent with past work that has been compared with field observations of speeds.

*Reply : This was corrected (see previous comment). Please note that we recomputed all the rip current outputs and modified the figures and table accordingly. Given the proportionality between former and revised rip flow speed velocities, results did not change, only the thresholds did.*

- Figure 3: The way  $S(x)$  is drawn as a square wave,  $dS/dx$  is not differentiable... would it make sense to show linear variations in  $S$  from the bar to the channel center instead?

*Reply : Thank you for this comment we now shown a linear alongshore variation of wave set-up*

- Figure 3d, 4b: I am confused by the diagrams in Figure 3d and 4b. What are the x and y axes?

*Reply : Thank for for this comment, which is in line with a comment of the other reviewer. Figures 3d and 4b have been revised to provide clear insight into the wave height decay model, which arte now of the form :*

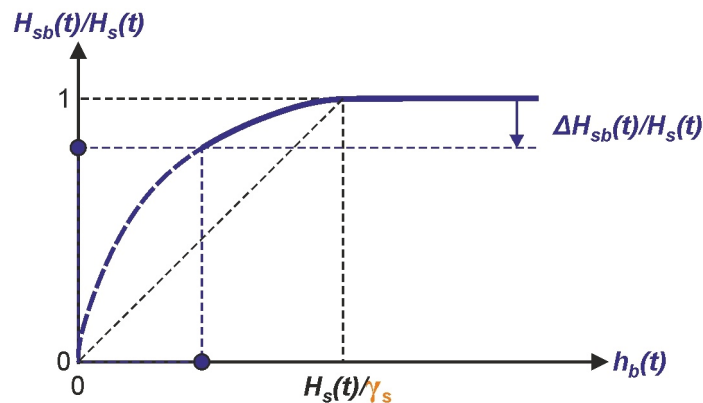

- L165: “no theoretical framework to estimate a measure of the shore-break wave energy” – If this is the case, I might describe the following formulations as physics-informed rather than physics-based, but this is a wording nuance

*Reply : We fully agree with this comment. Because depth-induced wave breaking dissipation model used for both the shore-break and rip current models is physics-informed, we now use “semi-empirical” instead of physics-based through the manuscript. Please note that the paper title was slightly reworded accordingly accordingly.*

- L186: Does the squared quantity come from the same “decay law” used in the rip-current formulation? Could write this as a 3-part equation for wave-breaking types (subaerial bar, bar-breaking, and shoreline-breaking)?

*Reply : The Reviewer is right, this is now clarified “..., following the same depth-induced breaking irregular wave height decay law as for the rip current model, ...”*

- L188: Could  $Z_1$  be written as  $z_{\bar{}}$ , for consistency with the rip-current formula?

*Reply : We agree, it was replaced by in the text and figures*

- L169: “deep water wavelength” - Is it possible that the wave condition upon shore-breaking deviates from the deep-water wavelength, since breaking on the bar could filter out some frequencies given differences in steepening and breaking? Particularly for wavefields with broad or multi-peaked frequency spectra. Could you comment on when using offshore wavelength is relevant?

*Reply : this is now specified “herefore, we introduce a shore-break wave energy parameter  $E_{sb} = I_r H^2 s_b$ , assuming no change in peak wave period as the waves pass over the sandbar(s) before reaching the shore, which therefore reads : ...”*

- L169: Should this be  $T_p$  squared? L173: Is a factor of  $\sqrt{2\pi}$  missing in the equation?

*Reply : The Reviewer is right. While it was a typo for  $T_p$  squared, it was an omission for  $2\sqrt{\pi}$ . Although this does not changes the message of the paper and overall results, we recomputed the time series and changed the figures accordingly. Model skill only marginally changed.*

- L195: “thresholds were computed in order to obtain the same number of modelled hazard levels” – does it need to be exactly the same number? You could allow some uncertainty to avoid overfitting / specify confidence intervals on this choice of ranges. I doubt the confidence is reflected in the significant digits shown, with 1 cm/s and 0.01 m<sup>2</sup> resolution.

*Reply : This was to our knowledge the only approach possible to use without using some a priori assumption. We understand that some confidence band could be provided, but the limited number of data available, especially in the high hazard range, does allow us to do so.*

- L200: “daily-mean” – Is the mean, max, or median most relevant for hazard? I would think maximum may be most relevant. Daily is somewhat coarse. I wonder about having at least having morning and afternoon to capture some of the tidal variability, and could be relevant for shift staffing by lifeguards.

*Reply : This is a relevant comment, and it is also why we believe that the hourly and coarser daily mean approaches are complementary. Lifeguards in France are deployed on a daily basis, which makes the daily approach particularly relevant. We have now clarified why and how these two approaches complement each other, and we explain how the daily approach can also be useful in this context : “The daily-mean rip-current hazard forecast is important for providing a straightforward message to the general public, and can also assist lifeguard managers in scheduling lifeguards in advance, ensuring they are deployed to the beaches where they will be most needed. In this context, the daily-mean wave factor ( $W_f$ ) appears to be a simple yet powerful tool for predicting and communicating high rip-current hazard days. It is also important to note that the correlation between the hourly lifeguard-perceived rip current hazard ( $R_{HI}$ ) and the hourly wave factor ( $W_f$ ) remains relatively high ( $R = 0.65$ ). This indicates that, although  $W_f$  alone does not account for tidal modulation, it still explains more than 40% of the observed variability in lifeguard-perceived rip current hazard. Overall, predicting daily-mean  $W_f$  is complementary to the higher-frequency rip-current hazard hourly prediction throughout the day with our semi-empirical model, and to the shore-break hazard model which can be used for both daily-mean and hourly predictions.”*

- L208-211: “by merging [...] into low-hazard [...]and[...] moderate- to high-hazard hours [...], the accuracy increases” – It would be worth discussing here or in the Discussion why the 5-level scale did not perform well. Was it because there wasn’t enough data or that the

parameterizations capture a clear enough relationship between inputs and outputs to predict hazard on a finer scale?

*Reply : Mechanically, the accuracy in the confusion matrix increases with the number of levels in the hazard scale. We already discussed why excellent metrics cannot be reached here, notably because here we are using lifeguard-perceived data, we now expand on this in the revised manuscript, including using other sources of data : “Indeed, as beach safety professionals, lifeguards are supposed to develop a more robust hazard perception than laypersons (Sandman et al., 1987; Slovic, 1999). However, according to Rowe and Wright (2001), it can also be argued that lifeguards remain human beings whose hazard perception can be influenced by personal factors (experience, gender, etc.). Using average lifeguard-perceived hazard data from all the lifeguards on duty, instead of the chief lifeguard only, could provide a more robust data to calibrate the model. The validation approach proposed here can be applied anywhere pending lifeguard hazard assessment can be performed. If such lifeguard data cannot be collected, a first-pass approach is to base the hazard level scales on the threshold values computed in southwest France (Table 1). Once again, such model application together with lifeguard-perceived hazard should be tested elsewhere to address the influence of beach state, modal wave climate and lifeguard perception on these threshold values. Since collecting consistent hourly lifeguard-perceived hazard data over a few weeks and under varying tide and wave conditions may not be feasible at many locations, an alternative approach is to use lifeguard-reported incidents (see, for instance, Scott et al., 2014). While such data also incorporate the exposure component of risk (Stokes et al., 2017), they are more widely available and can be highly valuable, particularly for assessing whether the model can identify mass-rescue days.”*

- L230: “outliers” – Might these be worth discussing further since hazardous events that are “outliers” and not well forecast could be dangerous.

*Reply : we think that outliers may also be because the training dataset is not perfect, see reply to previous comment*

- Figure 6,9: Since panels a and b are duplicated in these two figures, consider merging these in one figure with both of the full the rip current and shore-break time series, which may be interesting to show how they vary differently with conditions (similar to Figure 11). The example shorter time window in panels d-i could be two separate figures for rip currents and shore-break. Just a suggestion.

*Reply: Thank you for this suggestion. We conducted some tests, but merging the two figures did not allow for providing zoomed-in plots, which we believe are useful.*

- Figure 7,10: Would a bin average help to show if the model tends to be over- or under-forecasting at different hazard levels?

*Reply : We believe this is already addressed in the right-hand panels and in the hourly confusion matrices (Figures 5 and 8).*

- L269: “should be tested elsewhere” – Here or in the Discussion (could go with paragraph beginning on line 295 in the Discussion), it would be good to discuss how the sandbar elevation and beach profile shape parameters can be inferred, and/or the need to get these morphology parameters through tuning/calibration with lifeguard data, which is also hard to get. In addition, note that this approach assumes that the beach is always channeled, and that channel rips are the strongest rips, as opposed to transient rip currents, structural rips, etc.

*Reply : Thank you for this comment, this is now discussed : “However, while parameters such as bar crest depth and channel depth are relatively simple, obtaining them remains challenging due to the difficulty of surveying the surf zone, which is not routinely monitored at most locations. This raises important considerations for the large-scale transferability of the models. Future applications will need to determine how these parameters can be feasibly obtained, whether through direct surveying, remote sensing, or empirical estimations based on regional morphology. Additionally, while the calibrated values used in this study may serve as a reference, their applicability to other sites remains uncertain, and further research is needed to assess whether re-calibration against lifeguard observations or other validation datasets is necessary at each new location.” We also now precise that we only look at channel rips : “his study focused on channel rip currents, the most common rip type on intermediate beaches, although other types of rip currents exist (see Dalrymple et al., 2011; Castelle et al., 2016b; Houser et al., 2020). With the notable exception of Casper et al. (2024), who explored the potential for forecasting flash rip hazards at a Californian beach, hazard forecasting for other rip current types has never been tested. Our model is therefore mostly adapted for intermediate, high-energy, sandy beaches”*

- L283: “daily-mean lifeguard perceived hazards” - Would daily max be better for hazard preparation, given that the mean could obscure a brief but high-risk time period? Or split into morning vs afternoon max or mean?

*Reply : See reply to a previous comment on the complementarity of daily-mean and hourly forecasts.*

- Figure 12: Why is the Dean profile so different from the measured profile?

*Reply : As discussed, using a more realistic Dean profile only slightly decrease model skill (note that with the slightly modified shore-break wave model the decrease is even smaller) : “the Dean profile (solid blue line in Figure 11b) is much steeper than the alongshore-averaged profile. However, by changing  $a=-2.75$  into  $a=-1.75$ , which is in much better agreement with the measured profile (dotted blue line in Figure 11b), the correlation between Esb and SHI is approximately the same ( $R=0.70$ , with a marginal decrease by  $\approx -0.5\%$  using the dotted blue line profile in Figure 11b). This once again shows that beach surveys can be used instead of a Dean profile calibrated with lifeguard-perceived hazards.*

- L322: “weak but significant” - Is this statistically significant?

*Reply : not really, “significant” has been removed*

- L366: “only a few basic beach morphology metrics” - This may be a little vague and subjective use of “basic,” clarify.

*Reply : We agree that “basic” is not the appropriate term here, it has been removed.*

- L299-L305:  $d=6.5$  m seems like an unrealistically deep channel. Did you consider constraining the parameter range in the fit to physically realistic values? The skill was similar for more realistic values so this would not change the results much but could provide more realistic predictions for future conditions.

*Reply : We allowed the model to consider a wide range of morphology metrics. However, constraining the model to more realistic values results in only a slight decrease in model skill,*



as discussed : “For instance, the correlation between  $V$  and  $RHl$  decreased slightly from 0.77 to 0.75 ( $\approx -3\%$ ) when assuming a higher bar crest ( $z_{bar} = -2$  m instead of  $-3$  m) or a much shallower channel ( $d = 2$  m instead of 6.5 m), which are closer to average values in southwest France. This suggests that a decent model skill can be achieved with a rough estimate of the bar/rip morphology, further implying that temporal variability in beach morphology can be neglected in the model.”

### Minor typographic suggestions:

*Reply : all the minor suggestions listed below were taken into account, unless specified below. Please note that these comments are mostly related to colors. We thank Reviewer #2 for their interest for making scientific results accessible to everyone, including color blind people. Interestingly enough, the 1st author of this paper is colour blind, at a severe stage which, I can testify, is a real pain when dealing with plots from students, papers, talks in conference, etc. Surprisingly, I am severely colour blind, and jet is still kind of my favourite as it goes through the 3 primary colors, which is great compared to some proposed colorbars which are terrible (at least to me). In fact, Jet colorbar is only terrible for achromatopsia, which is the most severe and rarest colour blindness, and not very good for the blue-yellow vision deficiency, which is pretty rare too. But it is still pretty good, and to me one of the best, for the red-green deficiency of which I have more or less the 4 sub-types of deficiency. I have tested many “color-blind friendly” colormaps but they are much worse than Jet for me, I actually see not much contrast. Instead jet colormap or any plot where primary colors are used are the only way for me to see contrast. Given that I want to use these figures for presentation and be able to easily see the contrast I therefore decided to stick to jet colorbar and primary colors in the revised manuscript. I however want to thank again Reviewer #2 for their interest of data visualisation for color blind people.*

§ L2: change “can expose to” to “can be exposed”

§ L5: change “allow to compute” to “can be used to compute the time”

§ L8: August date missing, August 31?

§ L12: change “where wave forecast is available” to “where wave forecasts are available”

§ L14: remove “e.g.”

§ L17: remove “been” in “have been greatly increased”

§ L18: remove “e.g.”

§ L43: lengthy paragraph- could start a new paragraph at “Shore-break”

§ L69: change “estimate” to “estimates”

§ L70: add “an” before “associated 5-level scale”

§ L71: change “can be either given thanks to” to “either be given based on”

§ L71: remove “e.g.”

§ L103: change “surf-zone hazard forecast” to “surf-zone hazard forecasts”

§ L104: change “numerical wave hindcast instead” to “numerical wave hindcast data instead”

§ L104: change “consisted in an analysis” or “consisted of an analysis”

§ L108: change “as unified” to “including unified”

§ L111: change “was assumed representative” to “was assumed to be representative”

§ L126: here “RH<sub>l</sub>” and “SH<sub>l</sub>” have a “l” subscript- correct typos throughout the manuscript where “l” is not subscripted- same comment for “m” subscript

§ L135: notation- consider using x as cross-shore coordinate and y as alongshore coordinate for consistency with most of the surfzone literature, also consider  $\bar{\eta}$  for setup instead of S, which is typically used for radiation stress

*Reply : We kept the x/y coordinates system by replaced S by  $\bar{\eta}$ , and the tide elavation was changed from eta to zeta. Modifications have been made in both the text and figures*

§ Figure 3: Hard to see the red text on the blue background in panel a.

*Reply : See colorblind comment*

§ Figure 4: Consider changing the notation for the terrace elevation, Z<sub>l</sub>, elsewhere “l” is used for lifeguard.

§ L171: Should the subscript be ssb for H?

§ Figure 5,8: is it typical for the y axis to be flipped like this in the confusion matrix?

*Reply : Yes it is*

§ Figure 11: hard to see the difference between the dark pink and red, could switch to red-blue colors in panel d or other colorblind friendly palette

*Reply : See colorblind comment*

§ L285: add “indicating” after “notation”

§ Figure 12: consider switching to a colorblind friendly colorbar, caption unclear- suggest rephrasing to “with the blue solid (dotted) lines depicting...”

*Reply : see colorblind comment*

§ L332-L334: remove unnecessary use of “e.g.”

§ L336: change “model” to “models”
